# Supplementary material for: Common reef-building coral in the Northern Red Sea resistant to elevated temperature and acidification
Source: PubMed Central journal article supplement (PMC5451809; doi:10.1098/rsos.170038), 2017-05-17
Supplement: rsos170038supp3.pdf [file rsos170038supp3.pdf]

(a) Eilat coral reef

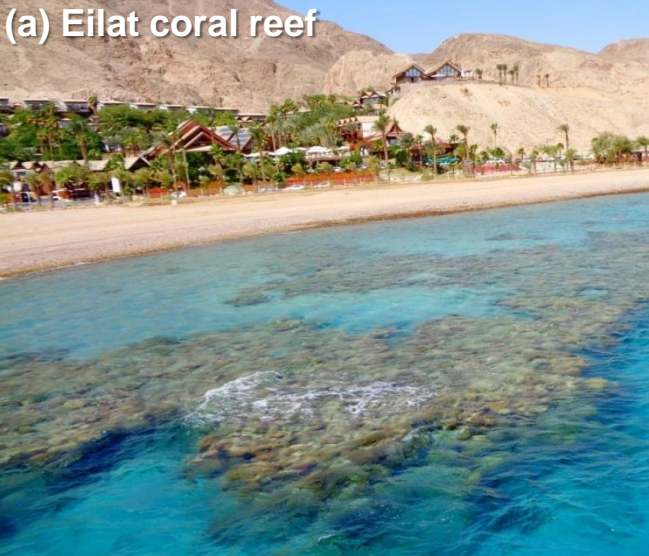

(b) *Stylophora pistillata*

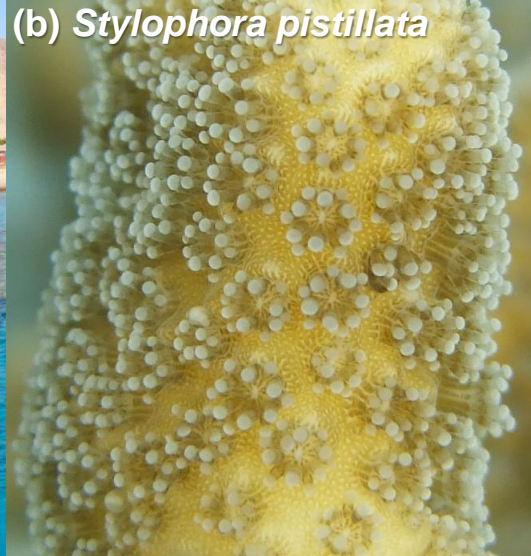

(c) Red Sea Simulator

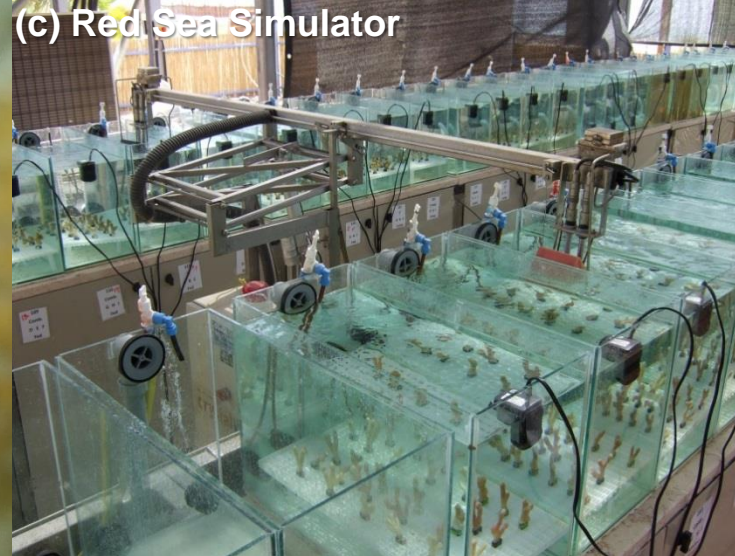

(d) Long-term SST in the GoA (Eilat area) 1988-2016

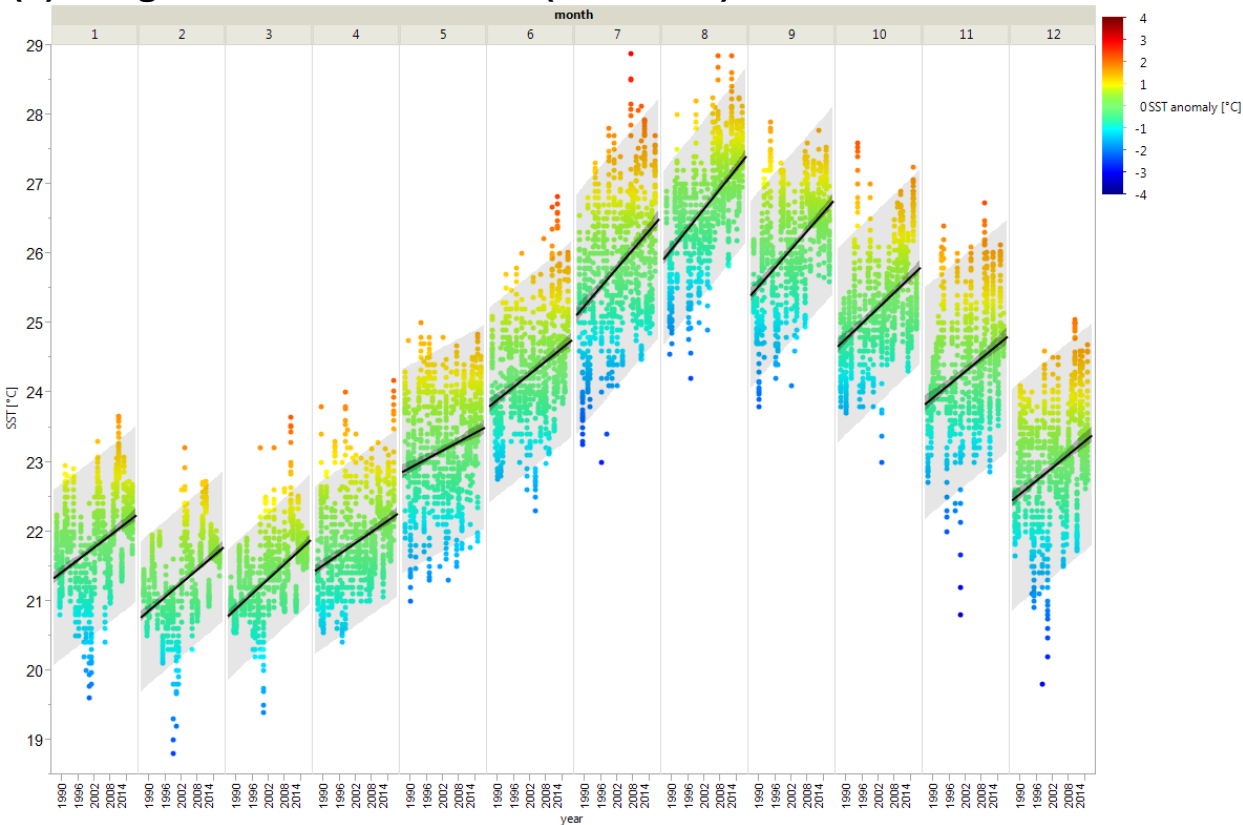

(e) Monthly warming rates 1988-2016 [°C/decade]

|     |                 |
|-----|-----------------|
| Jan | $0.30 \pm 0.03$ |
| Feb | $0.33 \pm 0.02$ |
| Mar | $0.36 \pm 0.02$ |
| Apr | $0.27 \pm 0.03$ |
| May | $0.21 \pm 0.03$ |
| Jun | $0.31 \pm 0.03$ |
| Jul | $0.45 \pm 0.04$ |
| Aug | $0.48 \pm 0.03$ |
| Sep | $0.44 \pm 0.03$ |
| Oct | $0.37 \pm 0.03$ |
| Nov | $0.32 \pm 0.04$ |
| Dec | $0.32 \pm 0.03$ |
