# Supplementary material for: Common reef-building coral in the Northern Red Sea resistant to elevated temperature and acidification
Source: PubMed Central journal article supplement (PMC5451809; doi:10.1098/rsos.170038), 2017-05-17
Supplement: rsos170038supp5.pdf [file rsos170038supp5.pdf]

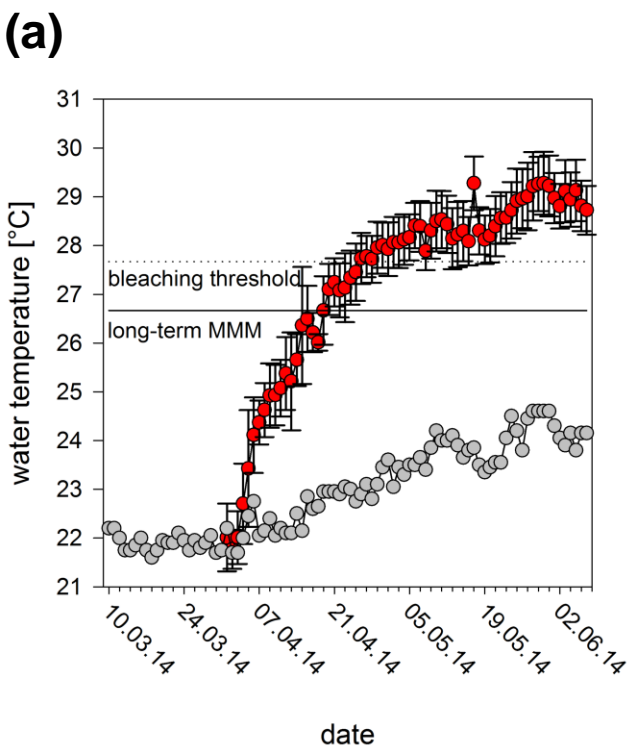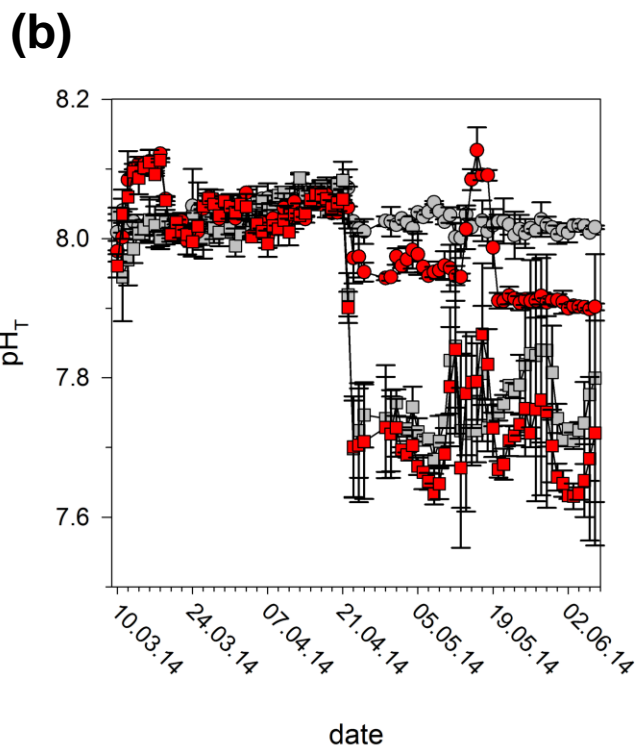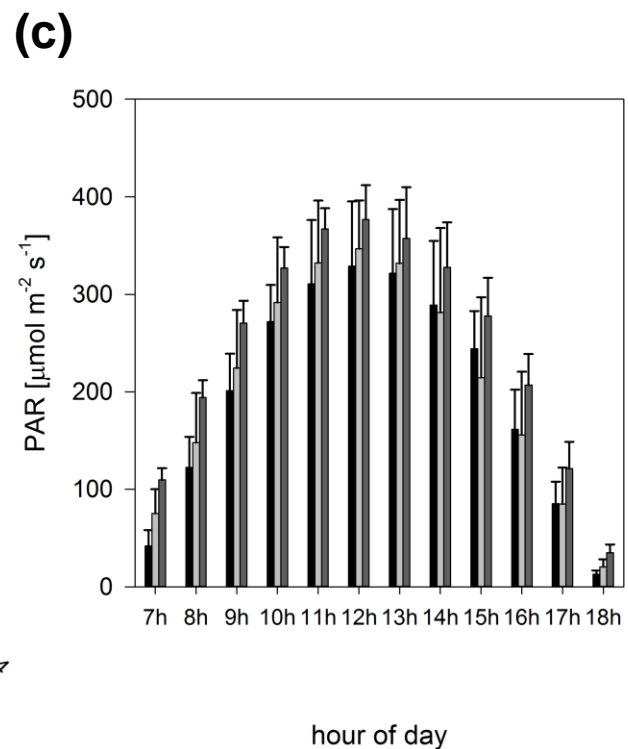

**(d)**

| $\text{pH}_T$ | SD   | Temp [°C] | Time period | TA [ $\mu\text{mol kg}^{-1}$ ] | SD    | DIC [ $\mu\text{mol kg}^{-1}$ ] | SD    | $\text{pCO}_2$ [ $\mu\text{atm}$ ] | SD     | $\text{CO}_{2(\text{aq})}$ [ $\mu\text{mol kg}^{-1}$ ] | SD   | $\text{HCO}_3^-$ [ $\mu\text{mol kg}^{-1}$ ] | SD    | $\text{CO}_3^{2-}$ [ $\mu\text{mol kg}^{-1}$ ] | SD    | $\Omega_{\text{arag}}$ | SD   |
|---------------|------|-----------|-------------|--------------------------------|-------|---------------------------------|-------|------------------------------------|--------|--------------------------------------------------------|------|----------------------------------------------|-------|------------------------------------------------|-------|------------------------|------|
| 8.02          | 0.00 | 23        | 27-29/04/14 | 2499.67                        | 2.99  | 2183.93                         | 1.21  | 466.77                             | 3.19   | 13.54                                                  | 0.09 | 1948.03                                      | 1.07  | 222.36                                         | 1.39  | 3.36                   | 0.02 |
| 8.02          | 0.01 | 23        | 18-20/05/14 | 2501.21                        | 1.45  | 2188.50                         | 3.84  | 473.77                             | 9.29   | 13.75                                                  | 0.27 | 1954.23                                      | 6.35  | 220.51                                         | 2.88  | 3.33                   | 0.04 |
| 8.01          | 0.00 | 24        | 05-07/06/14 | 2493.47                        | 5.67  | 2176.00                         | 8.32  | 479.63                             | 7.92   | 13.56                                                  | 0.22 | 1938.83                                      | 9.53  | 223.61                                         | 1.46  | 3.39                   | 0.02 |
| 7.95          | 0.02 | 28        | 27-29/04/14 | 2498.58                        | 6.53  | 2188.20                         | 6.98  | 581.47                             | 26.99  | 14.91                                                  | 0.69 | 1952.37                                      | 13.34 | 220.90                                         | 7.52  | 3.41                   | 0.12 |
| 8.00          | 0.09 | 28        | 18-20/05/14 | 2500.46                        | 2.01  | 2160.73                         | 61.22 | 526.23                             | 131.95 | 13.49                                                  | 3.38 | 1907.70                                      | 95.82 | 239.52                                         | 37.98 | 3.70                   | 0.59 |
| 7.90          | 0.00 | 29        | 05-07/06/14 | 2489.17                        | 10.55 | 2205.50                         | 10.66 | 675.60                             | 6.09   | 16.92                                                  | 0.15 | 1984.27                                      | 10.2  | 204.28                                         | 0.45  | 3.17                   | 0.01 |
| 7.74          | 0.02 | 23        | 27-29/04/14 | 2501.70                        | 3.33  | 2338.70                         | 13.60 | 999.17                             | 59.75  | 28.99                                                  | 1.73 | 2179.43                                      | 17.55 | 130.26                                         | 5.70  | 1.97                   | 0.09 |
| 7.74          | 0.01 | 23        | 18-20/05/14 | 2503.68                        | 3.17  | 2341.73                         | 7.34  | 1005.1                             | 29.82  | 29.16                                                  | 0.87 | 2182.87                                      | 9.12  | 129.71                                         | 2.79  | 1.96                   | 0.04 |
| 7.77          | 0.03 | 24        | 05-07/06/14 | 2496.89                        | 0.43  | 2315.03                         | 15.30 | 933.90                             | 80.54  | 26.41                                                  | 2.28 | 2147.23                                      | 22.15 | 141.38                                         | 9.08  | 2.15                   | 0.14 |
| 7.73          | 0.01 | 28        | 27-29/04/14 | 2504.85                        | 3.74  | 2322.30                         | 5.15  | 1083.77                            | 15.83  | 27.79                                                  | 0.41 | 2150.83                                      | 5.85  | 143.69                                         | 1.43  | 2.22                   | 0.02 |
| 7.74          | 0.08 | 28        | 18-20/05/14 | 2502.13                        | 4.21  | 2312.20                         | 41.80 | 1058.63                            | 208.47 | 27.14                                                  | 5.34 | 2136.90                                      | 58.59 | 148.16                                         | 22.12 | 2.29                   | 0.34 |
| 7.69          | 0.03 | 29        | 05-07/06/14 | 2492.71                        | 1.78  | 2324.37                         | 15.23 | 1208.60                            | 107.14 | 30.27                                                  | 2.68 | 2158.43                                      | 21.94 | 135.68                                         | 9.35  | 2.10                   | 0.15 |
