# Supplementary material for: Common reef-building coral in the Northern Red Sea resistant to elevated temperature and acidification
Source: PubMed Central journal article supplement (PMC5451809; doi:10.1098/rsos.170038), 2017-05-17

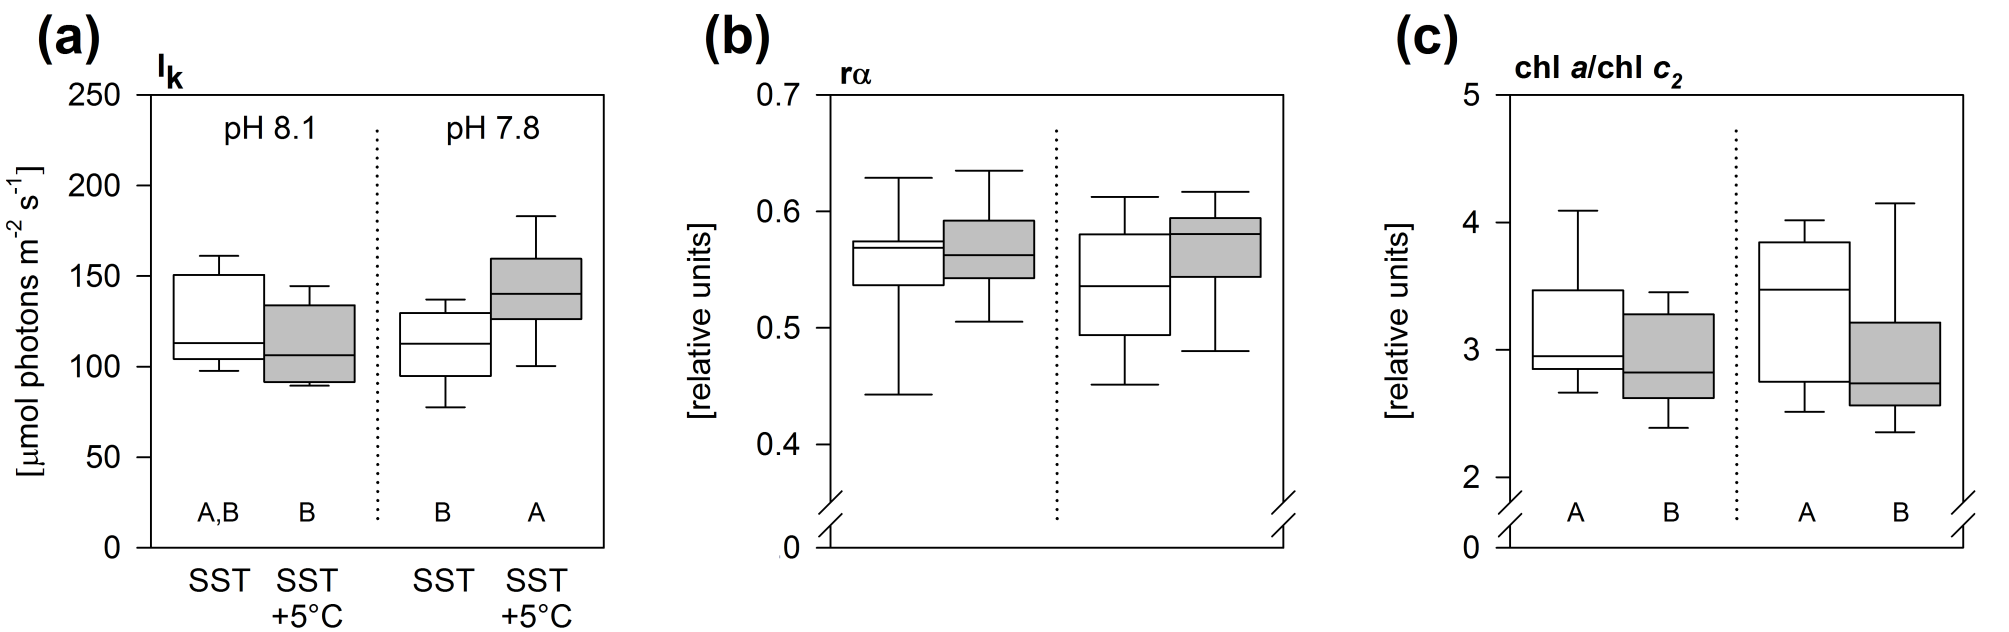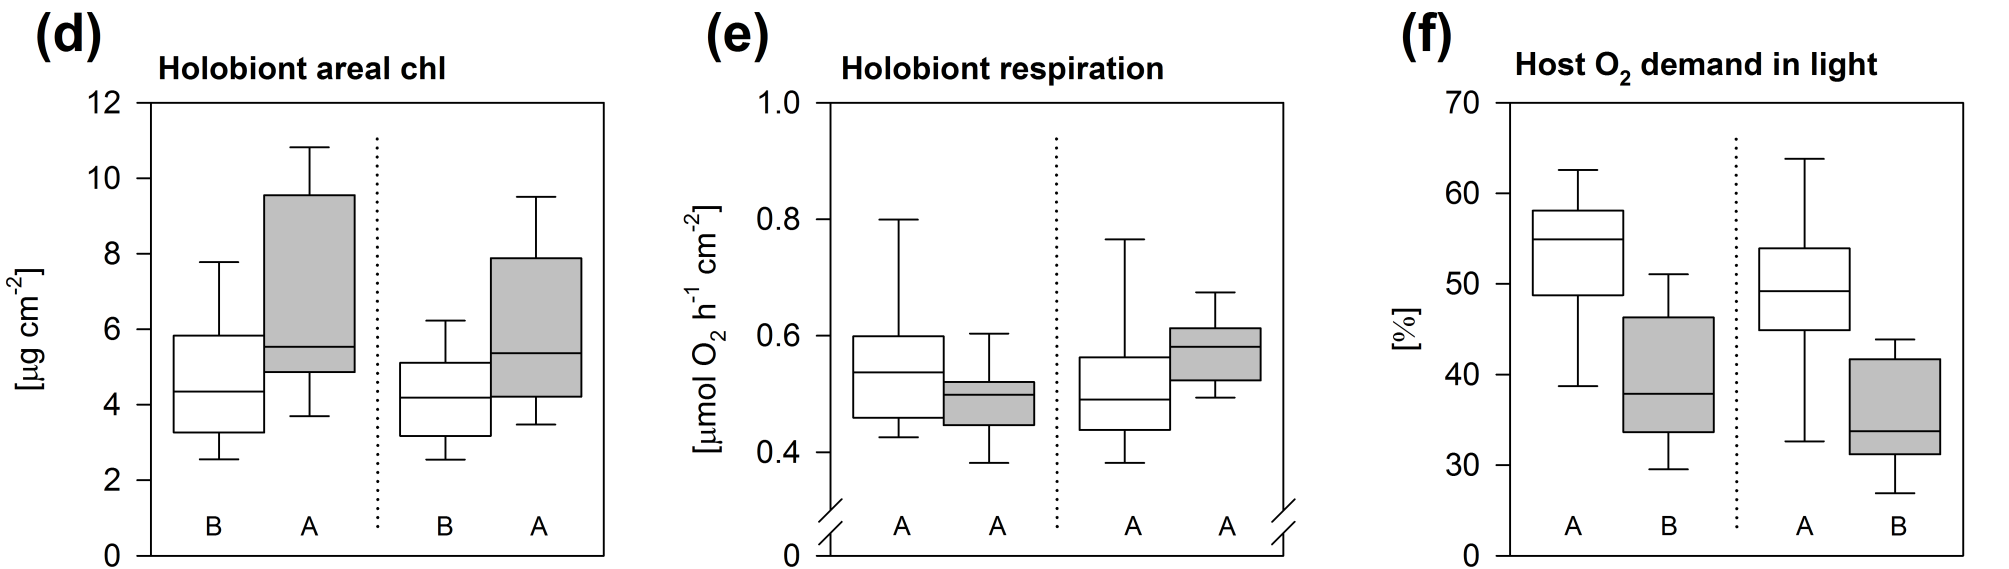

Supplement: rsos170038supp6.pdf [file rsos170038supp6.pdf]
